# Supplementary material
Source: publisher figshare collection journal article supplement (https://geolsoc.figshare.com/ndownloader/files/27948686)
Supplement: Supplementary file 1 [file 27948686]

**Appendix 1** GPS coordinates of chert and muddy siltstone samples from the North Qilian Belt AC

| Number | Sample | Outcrop | GPS coordinate | Lithology |
| --- | --- | --- | --- | --- |
| 1 | DGK1 | Donggoukou | N38°03.45′, E100°53.32′ | red chert |
| 2 | DGK2 | Donggoukou | N38°03.45′, E100°53.32′ | red chert |
| 3 | DGK3 | Donggoukou | N38°03.45′, E100°53.32′ | black chert |
| 4 | DGK4 | Donggoukou | N38°03.45′, E100°53.32′ | red chert |
| 5 | DGK5 | Donggoukou | N38°03.45′, E100°53.32′ | muddy siltstone |
| 6 | DGK6 | Donggoukou | N38°03.45′, E100°53.32′ | muddy siltstone |
| 7 | DGK7 | Donggoukou | N38°03.45′, E100°53.32′ | silty mudstone |
| 8 | DGK8 | Donggoukou | N38°03.45′, E100°53.32′ | muddy siltstone |
| 9 | DGK9 | Donggoukou | N38°03.45′, E100°53.32′ | red chert |
| 10 | DGK10 | Donggoukou | N38°03.45′, E100°53.32′ | red chert |
| 11 | DGK11 | Donggoukou | N38°03.45′, E100°53.32′ | red chert |
| 12 | DGK12 | Donggoukou | N38°03.45′, E100°53.32′ | red chert |
| 13 | DGK13 | Donggoukou | N38°03.45′, E100°53.32′ | silty mudstone |
| 14 | DGK14 | Donggoukou | N38°03.45′, E100°53.32′ | silty mudstone |
| 15 | DGK15 | Donggoukou | N38°03.45′, E100°53.32′ | silty mudstone |
| 16 | DGK16 | Donggoukou | N38°03.45′, E100°53.32′ | silty mudstone |
| 17 | DGK17 | Donggoukou | N38°03.45′, E100°53.32′ | silty mudstone |
| 18 | DGK18 | Donggoukou | N38°03.45′, E100°53.32′ | muddy siltstone |
| 19 | BDK1 | Biandukou | N38°12.46′, E100°56.25′ | red chert |
| 20 | BDK2 | Biandukou | N38°12.46′, E100°56.25′ | gray chert |
| 21 | BDK3 | Biandukou | N38°12.46′, E100°56.25′ | gray chert |
| 22 | QSG2 | Qingshuigou | N38°19.51′, E99°50.91′ | black chert |
| 23 | QSG3 | Qingshuigou | N38°17.96′, E99°50.67′ | grey chert |
| 24 | QSG4 | Qingshuigou | N38°17.96′, E99°50.67′ | grey chert |
| 25 | BJS1 | Baijingsi | N38°05.54′, E100°32.90′ | grey-green chert |
| 26 | BJS2 | Baijingsi | N38°05.54′, E100°32.90′ | red chert |
| 27 | BMG5 | Bianmagou | N38°33.66′, E99°29.04′ | black chert |
| 28 | BMG6 | Bianmagou | N38°35.46′, E99°29.01′ | black chert |
| 29 | YD1 | Shihuigou | N36°53.94′, E103°14.04′ | red chert |
| 30 | YD2 | Shihuigou | N36°53.94′, E103°14.04′ | red chert |
| 31 | YD3 | Shihuigou | N36°53.94′, E103°14.04′ | red chert |
| 32 | YD4 | Shihuigou | N36°53.94′, E103°14.04′ | red chert |
| 33 | YD5 | Shihuigou | N36°53.94′, E103°14.04′ | grey chert |
| 34 | YD8 | Shihuigou | N36°53.94′, E103°14.04′ | red chert |
| 35 | YD9 | Shihuigou | N36°53.94′, E103°14.04′ | red chert |
| 36 | YD10 | Shihuigou | N36°51.02′, E103°13.42′ | grey chert |
| 37 | YD11 | Shihuigou | N36°51.02′, E103°13.42′ | grey chert |
| 38 | YD12 | Shihuigou | N36°51.02′, E103°13.42′ | grey chert |
| 39 | YD14 | Shihuigou | N36°51.02′, E103°13.42′ | grey chert |

**Appendix 2** Major element abundances (wt.%) of cherts from the North Qilian belt AC

| Sample | SiO2 | Al2O3 | TiO2 | FeO | Fe2O3 | MnO | MgO | CaO | Na2O | K2O | P2O5 | LOI | Total | MnO/TiO2 | Al2O3/TiO2 | Fe2O3/TiO2 | Al2O3/(Fe2O3+Al2O3) | Al/(Al+Fe+Mn) |
| --- | --- | --- | --- | --- | --- | --- | --- | --- | --- | --- | --- | --- | --- | --- | --- | --- | --- | --- |
| QSG2 | 96.83 | 1.25 | 0.05 | 0.09 | 0.36 | 0.00 | 0.16 | 0.11 | 0.03 | 0.29 | 0.07 | 0.38 | 99.62 | 0.00 | 25.00 | 7.20 | 0.78 | 0.73 |
| QSG3 | 94.45 | 0.90 | 0.06 | 0.13 | 1.54 | 0.00 | 0.27 | 0.23 | 0.05 | 0.37 | 0.19 | 1.40 | 99.59 | 0.00 | 15.00 | 25.67 | 0.37 | 0.35 |
| QSG4 | 95.66 | 0.97 | 0.03 | 0.13 | 0.44 | 0.00 | 0.22 | 0.50 | 0.00 | 0.36 | 0.31 | 1.02 | 99.64 | 0.00 | 32.33 | 14.67 | 0.69 | 0.62 |
| BJS1 | 81.58 | 6.40 | 0.28 | 1.71 | 1.52 | 0.03 | 3.42 | 0.37 | 0.58 | 1.29 | 0.15 | 2.45 | 99.78 | 0.11 | 22.86 | 5.43 | 0.81 | 0.65 |
| BMG6 | 63.32 | 14.29 | 0.82 | 4.60 | 3.08 | 0.18 | 4.22 | 0.31 | 1.96 | 2.64 | 0.14 | 4.01 | 99.57 | 0.22 | 17.43 | 3.76 | 0.82 | 0.63 |
| BMG5 | 86.88 | 3.79 | 0.09 | 2.66 | 1.48 | 0.25 | 1.68 | 0.42 | 0.00 | 0.32 | 0.29 | 1.47 | 99.33 | 2.78 | 42.11 | 16.44 | 0.72 | 0.45 |
| YD1 | 97.16 | 1.23 | 0.05 | 0.09 | 0.15 | 0.00 | 0.13 | 0.09 | 0.03 | 0.22 | 0.03 | 0.30 | 99.48 | 0.00 | 24.60 | 3.00 | 0.89 | 0.83 |
| YD3 | 96.08 | 2.16 | 0.11 | 0.09 | 0.45 | 0.00 | 0.24 | 0.07 | 0.04 | 0.39 | 0.04 | 0.60 | 100.27 | 0.00 | 19.64 | 4.09 | 0.83 | 0.80 |
| YD8 | 90.25 | 3.57 | 0.26 | 0.41 | 2.27 | 0.01 | 0.56 | 0.30 | 0.01 | 0.53 | 0.23 | 1.25 | 99.65 | 0.04 | 13.73 | 8.73 | 0.61 | 0.57 |
| YD10 | 95.38 | 2.04 | 0.10 | 0.13 | 0.27 | 0.00 | 0.24 | 0.12 | 0.01 | 0.36 | 0.04 | 0.87 | 99.56 | 0.00 | 20.40 | 2.70 | 0.88 | 0.83 |
| YD11 | 93.24 | 2.52 | 0.11 | 0.13 | 1.10 | 0.00 | 0.37 | 0.09 | 0.59 | 0.53 | 0.10 | 1.15 | 99.93 | 0.00 | 22.91 | 10.00 | 0.70 | 0.67 |
| YD12 | 86.31 | 2.99 | 0.18 | 0.22 | 1.32 | 0.02 | 0.36 | 3.79 | 0.02 | 0.49 | 0.07 | 3.76 | 99.53 | 0.11 | 16.61 | 7.33 | 0.69 | 0.65 |
| YD14 | 85.14 | 4.52 | 0.17 | 0.13 | 0.64 | 0.01 | 0.65 | 3.43 | 0.04 | 0.94 | 0.05 | 4.35 | 100.07 | 0.06 | 26.59 | 3.76 | 0.88 | 0.85 |
| DGK1 | 85.13 | 7.30 | 0.28 | 0.49 | 0.94 | 0.10 | 0.70 | 0.04 | 0.10 | 2.15 | 0.05 | 2.50 | 99.78 | 0.36 | 26.07 | 3.36 | 0.89 | 0.82 |
| DGK2 | 84.73 | 4.97 | 0.18 | 1.37 | 0.90 | 0.31 | 1.38 | 0.73 | 0.09 | 1.24 | 0.03 | 4.08 | 100.01 | 1.72 | 27.61 | 5.02 | 0.85 | 0.65 |
| DGK3 | 76.68 | 10.74 | 0.34 | 0.96 | 2.07 | 0.31 | 1.18 | 0.06 | 0.12 | 2.73 | 0.07 | 4.53 | 99.79 | 0.91 | 31.59 | 6.10 | 0.84 | 0.76 |
| BDK1 | 78.28 | 9.78 | 0.40 | 0.13 | 2.93 | 0.10 | 0.90 | 0.70 | 0.08 | 2.73 | 0.05 | 3.43 | 99.51 | 0.25 | 24.45 | 7.32 | 0.77 | 0.75 |
| BDK2 | 80.49 | 9.53 | 0.42 | 0.09 | 2.55 | 0.08 | 0.63 | 0.20 | 0.11 | 2.72 | 0.06 | 2.62 | 99.50 | 0.19 | 22.69 | 6.07 | 0.79 | 0.78 |
| BDK3 | 88.41 | 4.46 | 0.16 | 0.83 | 0.81 | 0.13 | 0.76 | 0.13 | 0.09 | 1.00 | 0.02 | 2.43 | 99.23 | 0.81 | 27.88 | 5.06 | 0.85 | 0.71 |
| DGK9 | 84.66 | 7.12 | 0.25 | 1.24 | 0.76 | 0.15 | 0.97 | 0.06 | 0.09 | 1.73 | 0.04 | 3.18 | 100.25 | 0.60 | 28.48 | 3.04 | 0.90 | 0.76 |
| DGK10 | 75.56 | 11.01 | 0.47 | 0.41 | 3.55 | 0.08 | 1.41 | 0.71 | 0.12 | 2.94 | 0.06 | 4.03 | 100.35 | 0.17 | 23.43 | 7.55 | 0.76 | 0.73 |
| DGK11 | 77.52 | 9.71 | 0.44 | 0.50 | 4.20 | 0.08 | 1.19 | 0.29 | 0.11 | 2.55 | 0.05 | 3.68 | 100.32 | 0.18 | 22.07 | 9.55 | 0.70 | 0.67 |
| DGK12 | 74.56 | 9.94 | 0.40 | 0.44 | 5.22 | 0.35 | 1.54 | 0.47 | 0.08 | 2.34 | 0.05 | 4.75 | 100.14 | 0.88 | 24.85 | 13.05 | 0.66 | 0.62 |

**Appendix 3** Trace element abundances (ppm) of cherts from the North Qilian belt AC

| Sample | Sc | V | Cr | Co | Ni | Cu | Zn | Ga | Rb | Sr | Y | Zr | Hf | Nb | Cs | Ba | Pb | Th | U | Th/U | Th/Sc |
| --- | --- | --- | --- | --- | --- | --- | --- | --- | --- | --- | --- | --- | --- | --- | --- | --- | --- | --- | --- | --- | --- |
| QSG2 | 2.48 | 32.05 | 10.41 | 1.07 | 3.61 | 11.08 | 8.10 | 1.57 | 9.99 | 15.71 | 7.23 | 10.24 | 0.33 | 1.39 | 1.64 | 449.80 | 9.00 | 0.96 | 0.57 | 1.68 | 0.39 |
| QSG3 | 5.74 | 143.47 | 18.43 | 0.29 | 8.13 | 47.03 | 12.06 | 1.95 | 13.45 | 73.88 | 7.10 | 25.18 | 0.71 | 2.33 | 1.00 | 307.30 | 26.88 | 2.28 | 2.35 | 0.97 | 0.40 |
| QSG4 | 2.12 | 93.09 | 11.44 | 2.00 | 11.62 | 30.58 | 13.05 | 1.86 | 15.47 | 67.72 | 10.12 | 12.68 | 0.29 | 1.42 | 1.35 | 621.37 | 11.16 | 0.83 | 1.51 | 0.55 | 0.39 |
| BJS1 | 6.89 | 41.40 | 36.33 | 13.70 | 16.99 | 14.35 | 26.01 | 8.56 | 48.98 | 50.06 | 10.82 | 56.42 | 1.61 | 6.41 | 4.24 | 293.80 | 10.22 | 6.95 | 1.18 | 5.89 | 1.01 |
| BMG5 | 3.93 | 29.33 | 1.19 | 11.14 | 81.68 | 73.42 | 39.83 | 5.43 | 15.33 | 31.48 | 10.20 | 22.49 | 0.65 | 2.71 | 0.78 | 183.35 | 17.35 | 2.34 | 0.65 | 3.60 | 0.60 |
| BMG6 | 21.30 | 193.95 | 124.14 | 24.49 | 77.93 | 55.89 | 106.35 | 21.25 | 89.39 | 78.10 | 23.06 | 134.89 | 3.89 | 15.63 | 2.57 | 768.82 | 20.36 | 19.74 | 1.87 | 10.56 | 0.93 |
| YD1 | 15.09 | 102.76 | 96.56 | 16.10 | 31.03 | 30.77 | 72.00 | 18.53 | 126.94 | 98.43 | 27.06 | 124.08 | 3.84 | 11.98 | 7.50 | 325.87 | 17.21 | 14.60 | 2.70 | 5.41 | 0.97 |
| YD3 | 2.99 | 17.19 | 9.59 | 2.51 | 5.68 | 22.69 | 13.16 | 2.74 | 14.09 | 13.46 | 5.32 | 20.06 | 0.64 | 2.44 | 0.86 | 307.65 | 4.45 | 1.92 | 0.84 | 2.29 | 0.64 |
| YD8 | 5.04 | 31.51 | 55.09 | 8.05 | 8.94 | 89.11 | 29.02 | 5.14 | 17.51 | 120.69 | 17.30 | 40.12 | 0.99 | 4.68 | 1.04 | 516.43 | 8.71 | 3.13 | 2.41 | 1.30 | 0.62 |
| YD10 | 3.51 | 25.83 | 114.15 | 2.62 | 14.24 | 37.44 | 20.24 | 2.92 | 16.21 | 65.80 | 5.37 | 21.96 | 0.62 | 2.62 | 0.85 | 301.35 | 7.39 | 1.97 | 0.96 | 2.05 | 0.56 |
| YD11 | 3.50 | 56.61 | 10.35 | 4.59 | 23.50 | 65.72 | 27.14 | 3.87 | 20.11 | 194.97 | 10.18 | 25.03 | 0.68 | 2.92 | 1.06 | 448.01 | 11.73 | 2.36 | 1.32 | 1.79 | 0.67 |
| YD12 | 4.62 | 27.36 | 30.98 | 6.65 | 11.53 | 38.56 | 23.96 | 4.05 | 15.75 | 32.20 | 6.30 | 37.51 | 0.94 | 4.00 | 0.93 | 451.03 | 5.68 | 2.42 | 1.00 | 2.42 | 0.52 |
| YD14 | 5.48 | 34.11 | 19.10 | 3.88 | 0.44 | 39.59 | 9.63 | 5.82 | 29.69 | 54.61 | 6.13 | 35.84 | 0.96 | 4.19 | 1.29 | 210.74 | 5.20 | 3.87 | 0.76 | 5.09 | 0.71 |
| DGK1 | 6.52 | 24.38 | 4.27 | 10.82 | 7.96 | 17.83 | 23.11 | 6.86 | 55.56 | 96.41 | 7.56 | 35.00 | 0.96 | 4.31 | 7.56 | 280.47 | 9.56 | 4.54 | 0.50 | 9.08 | 0.70 |
| DGK3 | 10.33 | 46.96 | 17.20 | 20.31 | 12.67 | 117.38 | 33.55 | 13.48 | 117.07 | 288.70 | 11.05 | 59.01 | 1.74 | 5.87 | 9.86 | 482.02 | 11.09 | 5.82 | 2.14 | 2.72 | 0.56 |
| DGK4 | 7.81 | 42.36 | 14.11 | 10.69 | 5.74 | 31.94 | 16.06 | 11.37 | 96.37 | 186.07 | 10.89 | 59.66 | 1.60 | 6.53 | 9.34 | 415.72 | 7.74 | 7.51 | 1.42 | 5.29 | 0.96 |
| BDK1 | 9.27 | 48.38 | 42.82 | 5.96 | 2.66 | 18.90 | 22.72 | 14.15 | 130.22 | 128.92 | 13.95 | 86.22 | 2.46 | 9.77 | 11.42 | 270.39 | 20.94 | 10.73 | 1.01 | 10.62 | 1.16 |
| BDK2 | 9.63 | 40.08 | 40.90 | 8.36 | 6.34 | 29.02 | 25.55 | 13.67 | 130.68 | 131.18 | 15.06 | 91.88 | 2.55 | 9.70 | 10.73 | 302.00 | 20.47 | 11.11 | 1.22 | 9.11 | 1.15 |
| BDK3 | 4.51 | 28.14 | 14.08 | 7.52 | 13.89 | 15.34 | 23.59 | 6.87 | 47.76 | 55.34 | 6.33 | 33.76 | 0.89 | 4.34 | 3.17 | 154.99 | 5.60 | 4.22 | 0.55 | 7.74 | 0.94 |
| DGK9 | 8.80 | 75.99 | 18.89 | 10.59 | 17.53 | 35.91 | 30.90 | 11.86 | 86.08 | 132.18 | 9.84 | 49.49 | 1.40 | 5.27 | 10.42 | 308.70 | 11.85 | 5.44 | 0.68 | 8.04 | 0.62 |
| DGK10 | 12.76 | 59.00 | 43.55 | 7.23 | 14.97 | 11.52 | 37.73 | 15.58 | 155.82 | 243.83 | 16.14 | 96.71 | 2.81 | 11.37 | 18.52 | 247.30 | 25.09 | 13.57 | 1.18 | 11.52 | 1.06 |
| DGK11 | 11.52 | 52.96 | 38.54 | 10.18 | 11.93 | 10.54 | 39.80 | 13.42 | 133.89 | 154.96 | 15.33 | 78.55 | 2.51 | 9.08 | 11.58 | 295.93 | 24.25 | 11.98 | 1.16 | 10.32 | 1.04 |
| DGK12 | 11.50 | 59.09 | 32.75 | 14.12 | 21.46 | 27.90 | 55.10 | 15.58 | 121.87 | 223.61 | 13.19 | 83.07 | 2.46 | 10.30 | 15.23 | 268.57 | 23.79 | 11.23 | 1.17 | 9.64 | 0.98 |

**Appendix 4** Rare earth element abundances (ppm) of cherts from the North Qilian belt AC

| Sample | QSG2 | QSG4 | QSG3 | BJS1 | BMG6 | BMG5 | YD1 | YD3 | YD8 | YD10 | YD11 | YD12 | YD14 | DGK1 | DGK3 | BDK1 | BDK2 | BDK3 | DGK9 | DGK10 | DGK11 | DGK12 |
| --- | --- | --- | --- | --- | --- | --- | --- | --- | --- | --- | --- | --- | --- | --- | --- | --- | --- | --- | --- | --- | --- | --- |
| La | 6.34 | 10.70 | 8.70 | 16.82 | 46.00 | 13.02 | 44.39 | 5.23 | 11.90 | 6.76 | 8.91 | 5.53 | 9.41 | 11.61 | 18.00 | 27.66 | 26.90 | 12.77 | 14.22 | 31.03 | 26.98 | 27.45 |
| Ce | 9.22 | 17.03 | 12.31 | 32.64 | 106.14 | 30.36 | 82.93 | 10.60 | 27.56 | 15.18 | 21.62 | 12.53 | 18.96 | 25.38 | 43.37 | 58.69 | 57.84 | 28.31 | 30.15 | 64.32 | 56.69 | 61.65 |
| Pr | 1.28 | 1.84 | 1.52 | 3.69 | 11.17 | 3.82 | 10.04 | 1.28 | 3.49 | 1.61 | 2.11 | 1.49 | 2.22 | 2.46 | 4.76 | 6.23 | 6.21 | 2.85 | 3.14 | 7.19 | 6.48 | 6.65 |
| Nd | 4.93 | 7.18 | 5.60 | 13.93 | 41.51 | 16.73 | 38.91 | 4.79 | 14.85 | 6.02 | 8.26 | 5.81 | 8.09 | 8.66 | 18.78 | 22.67 | 22.21 | 9.91 | 10.54 | 25.06 | 22.70 | 21.97 |
| Sm | 1.00 | 1.32 | 0.93 | 2.57 | 7.47 | 3.54 | 7.22 | 0.97 | 3.21 | 1.17 | 1.67 | 1.20 | 1.53 | 1.58 | 3.69 | 4.05 | 3.99 | 1.69 | 1.81 | 4.32 | 4.06 | 3.98 |
| Eu | 0.28 | 0.43 | 0.69 | 0.62 | 1.64 | 0.78 | 1.40 | 0.23 | 0.89 | 0.25 | 0.41 | 0.36 | 0.33 | 0.39 | 0.78 | 0.81 | 0.79 | 0.28 | 0.37 | 0.81 | 0.78 | 0.79 |
| Gd | 1.01 | 1.54 | 0.85 | 2.42 | 6.38 | 3.34 | 6.26 | 0.92 | 3.39 | 1.02 | 1.68 | 1.05 | 1.24 | 1.39 | 2.98 | 3.31 | 3.36 | 1.44 | 1.73 | 3.70 | 3.51 | 3.43 |
| Tb | 0.17 | 0.24 | 0.16 | 0.40 | 0.94 | 0.47 | 0.96 | 0.15 | 0.54 | 0.17 | 0.28 | 0.19 | 0.20 | 0.26 | 0.45 | 0.49 | 0.53 | 0.21 | 0.29 | 0.56 | 0.55 | 0.50 |
| Dy | 1.07 | 1.38 | 0.93 | 1.97 | 4.96 | 2.22 | 5.41 | 0.88 | 3.02 | 0.88 | 1.61 | 0.90 | 1.00 | 1.34 | 2.20 | 2.68 | 2.87 | 1.11 | 1.69 | 3.01 | 2.99 | 2.70 |
| Ho | 0.22 | 0.30 | 0.22 | 0.36 | 0.92 | 0.40 | 1.11 | 0.17 | 0.59 | 0.19 | 0.34 | 0.19 | 0.20 | 0.27 | 0.42 | 0.52 | 0.56 | 0.22 | 0.34 | 0.61 | 0.61 | 0.54 |
| Er | 0.65 | 0.85 | 0.75 | 1.03 | 2.60 | 0.97 | 2.93 | 0.51 | 1.58 | 0.52 | 0.94 | 0.52 | 0.56 | 0.71 | 1.18 | 1.52 | 1.58 | 0.62 | 0.98 | 1.75 | 1.68 | 1.49 |
| Tm | 0.12 | 0.13 | 0.13 | 0.17 | 0.40 | 0.13 | 0.44 | 0.09 | 0.22 | 0.09 | 0.16 | 0.11 | 0.11 | 0.13 | 0.19 | 0.24 | 0.26 | 0.10 | 0.15 | 0.27 | 0.27 | 0.24 |
| Yb | 0.81 | 0.79 | 0.96 | 1.05 | 2.65 | 0.76 | 2.80 | 0.61 | 1.35 | 0.62 | 0.98 | 0.65 | 0.68 | 0.82 | 1.22 | 1.51 | 1.62 | 0.69 | 0.98 | 1.75 | 1.71 | 1.55 |
| Lu | 0.12 | 0.13 | 0.17 | 0.17 | 0.40 | 0.11 | 0.45 | 0.09 | 0.20 | 0.10 | 0.16 | 0.10 | 0.11 | 0.13 | 0.20 | 0.23 | 0.24 | 0.11 | 0.14 | 0.27 | 0.25 | 0.23 |
| Total REE | 27.21 | 43.86 | 33.92 | 77.84 | 233.18 | 76.65 | 205.25 | 26.52 | 72.79 | 34.58 | 49.13 | 30.63 | 44.64 | 55.13 | 98.22 | 130.61 | 128.96 | 60.31 | 66.53 | 144.65 | 129.26 | 133.17 |
| Chondrite normalized | | | | | | | | | | | | | | | | | | | | | | |
| Ce* | 0.53 | 0.67 | 0.60 | 0.88 | 1.49 | 0.83 | 1.44 | 0.50 | 0.80 | 0.57 | 0.65 | 0.53 | 0.67 | 0.73 | 0.95 | 1.14 | 1.13 | 0.77 | 0.81 | 1.21 | 1.14 | 1.15 |
| Ce/Ce* | 0.21 | 0.31 | 0.25 | 0.45 | 0.86 | 0.44 | 0.69 | 0.25 | 0.42 | 0.32 | 0.40 | 0.28 | 0.34 | 0.42 | 0.55 | 0.62 | 0.62 | 0.44 | 0.45 | 0.64 | 0.60 | 0.64 |
| Eu* | 2.98 | 3.54 | 2.81 | 4.71 | 7.87 | 5.53 | 7.76 | 2.90 | 5.39 | 3.13 | 3.85 | 3.17 | 3.52 | 3.64 | 5.47 | 5.74 | 5.73 | 3.74 | 3.96 | 5.98 | 5.82 | 5.75 |
| Eu/Eu* | 1.34 | 1.74 | 3.50 | 1.88 | 2.98 | 2.02 | 2.58 | 1.13 | 2.36 | 1.14 | 1.52 | 1.62 | 1.34 | 1.53 | 2.04 | 2.01 | 1.97 | 1.07 | 1.33 | 1.94 | 1.92 | 1.95 |
| La/Yb | 5.30 | 9.18 | 6.14 | 10.85 | 11.76 | 11.61 | 10.74 | 5.81 | 5.97 | 7.39 | 6.16 | 5.76 | 9.37 | 9.59 | 9.99 | 12.41 | 11.25 | 12.52 | 9.80 | 12.05 | 10.69 | 11.98 |
| Lan/Cen | 1.80 | 1.64 | 1.85 | 1.35 | 1.13 | 1.12 | 1.40 | 1.29 | 1.13 | 1.16 | 1.08 | 1.15 | 1.30 | 1.20 | 1.08 | 1.23 | 1.22 | 1.18 | 1.23 | 1.26 | 1.24 | 1.16 |
| Shale normalized | | | | | | | | | | | | | | | | | | | | | | |
| Ce* | 0.14 | 0.22 | 0.18 | 0.39 | 1.11 | 0.35 | 1.04 | 0.13 | 0.32 | 0.16 | 0.21 | 0.14 | 0.22 | 0.26 | 0.46 | 0.65 | 0.64 | 0.30 | 0.33 | 0.73 | 0.65 | 0.66 |
| Ce/Ce* | 0.79 | 0.92 | 0.82 | 1.01 | 1.15 | 1.05 | 0.96 | 1.00 | 1.04 | 1.13 | 1.22 | 1.07 | 1.02 | 1.16 | 1.15 | 1.09 | 1.10 | 1.15 | 1.10 | 1.05 | 1.05 | 1.12 |
| Eu* | 0.14 | 0.21 | 0.13 | 0.36 | 0.99 | 0.49 | 0.96 | 0.14 | 0.47 | 0.16 | 0.24 | 0.16 | 0.20 | 0.21 | 0.47 | 0.52 | 0.52 | 0.22 | 0.25 | 0.57 | 0.54 | 0.53 |
| Eu/Eu* | 1.21 | 1.29 | 3.37 | 1.08 | 1.03 | 0.98 | 0.90 | 1.06 | 1.17 | 0.99 | 1.06 | 1.39 | 1.04 | 1.14 | 1.02 | 0.96 | 0.94 | 0.78 | 0.90 | 0.88 | 0.90 | 0.92 |
| Lasn/Ybsn | 0.67 | 1.17 | 0.78 | 1.38 | 1.49 | 1.47 | 1.36 | 0.74 | 0.76 | 0.94 | 0.78 | 0.73 | 1.19 | 1.22 | 1.27 | 1.58 | 1.43 | 1.59 | 1.25 | 1.53 | 1.36 | 1.52 |
| Las/Ces | 1.39 | 1.27 | 1.43 | 1.04 | 0.88 | 0.87 | 1.08 | 1.00 | 0.88 | 0.90 | 0.84 | 0.89 | 1.01 | 0.93 | 0.84 | 0.96 | 0.94 | 0.91 | 0.96 | 0.98 | 0.96 | 0.90 |

**Appendix 5** Major-, trace- and rare-earth element abundance of muddy siltstones from the North Qilian belt AC

| Sample | DGK5 | DGK6 | DGK7 | DGK8 | DGK13 | DGK14 | DGK15 | DGK16 | DGK17 | DGK18 |
| --- | --- | --- | --- | --- | --- | --- | --- | --- | --- | --- |
| Major Elements (wt.%) | | | | | | | | | | |
| SiO2 | 63.39 | 72.94 | 71.85 | 71.95 | 60.51 | 68.28 | 69.86 | 65.49 | 73.55 | 67.01 |
| TiO2 | 1.06 | 0.68 | 0.63 | 0.57 | 0.78 | 0.55 | 0.53 | 0.65 | 0.58 | 0.64 |
| Al2O3 | 22.77 | 13.52 | 14.86 | 14.05 | 17.71 | 13.12 | 13.35 | 13.30 | 9.95 | 11.07 |
| Fe2O3 | 0.72 | 1.52 | 2.23 | 4.12 | 2.40 | 2.15 | 2.33 | 1.65 | 3.62 | 1.88 |
| FeO | 0.40 | 1.14 | 0.36 | 0.81 | 2.91 | 2.41 | 0.89 | 3.28 | 0.29 | 2.39 |
| MnO | 0.03 | 0.14 | 0.07 | 0.18 | 0.06 | 0.08 | 0.07 | 0.09 | 0.26 | 0.33 |
| MgO | 0.77 | 1.15 | 0.99 | 0.95 | 2.32 | 2.29 | 2.00 | 2.47 | 1.49 | 3.39 |
| CaO | 0.45 | 0.14 | 0.08 | 0.14 | 0.52 | 0.55 | 1.45 | 1.06 | 1.81 | 2.09 |
| Na2O | 0.28 | 0.11 | 0.12 | 0.13 | 0.78 | 0.67 | 0.68 | 1.23 | 0.11 | 0.13 |
| K2O | 3.98 | 3.62 | 4.52 | 3.98 | 5.12 | 3.53 | 3.57 | 3.56 | 1.97 | 2.39 |
| P2O5 | 0.13 | 0.10 | 0.10 | 0.08 | 0.15 | 0.10 | 0.11 | 0.14 | 0.11 | 0.14 |
| LOI | 6.28 | 4.40 | 3.36 | 3.28 | 6.68 | 6.14 | 5.46 | 6.48 | 5.83 | 8.54 |
| TOTEL | 100.26 | 99.43 | 99.17 | 100.24 | 99.94 | 99.87 | 99.30 | 100.40 | 99.57 | 100.00 |
| Trace Elements (ppm) | | | | | | | | | | |
| Sc | 11.06 | 16.01 | 15.10 | 14.64 | 20.44 | 13.93 | 9.86 | 13.02 | 12.84 | 13.54 |
| V | 124.51 | 71.86 | 117.97 | 39.03 | 165.30 | 81.63 | 95.27 | 96.62 | 102.52 | 78.16 |
| Cr | 93.84 | 55.84 | 44.82 | 61.46 | 85.08 | 72.66 | 71.02 | 99.90 | 70.46 | 82.02 |
| Co | 7.85 | 20.77 | 7.20 | 21.61 | 15.44 | 9.44 | 7.29 | 11.83 | 14.14 | 14.49 |
| Ni | 48.94 | 22.08 | 19.30 | 25.99 | 51.47 | 31.33 | 19.02 | 27.92 | 26.29 | 35.27 |
| Cu | 35.28 | 60.56 | 150.77 | 63.76 | 54.55 | 44.02 | 41.20 | 31.32 | 15.16 | 21.44 |
| Rb | 194.23 | 172.49 | 217.86 | 195.92 | 241.31 | 170.85 | 180.16 | 159.13 | 82.31 | 110.28 |
| Sr | 432.38 | 405.78 | 364.09 | 301.28 | 113.59 | 81.06 | 109.80 | 102.62 | 409.68 | 104.42 |
| Y | 30.57 | 26.20 | 23.03 | 22.57 | 29.09 | 24.04 | 20.38 | 24.24 | 19.37 | 25.32 |
| Zr | 239.54 | 115.27 | 118.83 | 110.40 | 152.16 | 125.92 | 117.32 | 178.06 | 197.40 | 261.11 |
| Nb | 3.43 | 12.00 | 13.43 | 13.84 | 14.16 | 11.10 | 13.51 | 12.61 | 10.47 | 12.20 |
| Cs | 14.66 | 18.49 | 17.09 | 20.94 | 17.69 | 12.38 | 13.04 | 10.14 | 5.13 | 6.65 |
| Ba | 524.37 | 542.50 | 418.99 | 436.03 | 647.68 | 422.05 | 478.52 | 375.15 | 263.05 | 296.27 |
| Pb | 33.08 | 26.59 | 12.42 | 18.87 | 22.18 | 90.85 | 17.88 | 26.08 | 25.76 | 12.76 |
| Th | 35.49 | 14.39 | 16.36 | 18.69 | 16.47 | 12.84 | 12.29 | 15.01 | 10.50 | 13.68 |
| U | 4.31 | 1.97 | 2.08 | 1.76 | 3.20 | 2.54 | 3.01 | 2.93 | 3.62 | 3.09 |
| Hf | 6.93 | 3.43 | 3.29 | 3.49 | 4.44 | 3.61 | 3.44 | 4.84 | 5.31 | 7.22 |
| Rare Earth Elements (ppm) | | | | | | | | | | |
| La | 65.01 | 38.33 | 45.33 | 40.12 | 40.70 | 33.14 | 33.72 | 36.63 | 28.76 | 35.69 |
| Ce | 138.44 | 87.14 | 92.32 | 85.03 | 78.26 | 64.38 | 72.34 | 71.19 | 58.30 | 70.68 |
| Pr | 14.26 | 9.64 | 9.93 | 9.19 | 9.33 | 7.68 | 8.02 | 8.53 | 7.05 | 8.54 |
| Nd | 47.77 | 34.68 | 36.33 | 34.55 | 35.32 | 28.16 | 28.84 | 30.50 | 25.80 | 30.35 |
| Sm | 8.28 | 5.89 | 6.23 | 6.76 | 6.54 | 5.08 | 5.47 | 6.09 | 4.69 | 5.47 |
| Eu | 1.42 | 1.19 | 1.17 | 1.21 | 1.27 | 0.95 | 0.82 | 1.07 | 0.95 | 1.04 |
| Gd | 6.74 | 5.44 | 5.16 | 5.12 | 5.98 | 4.79 | 4.52 | 5.26 | 4.33 | 5.06 |
| Tb | 0.97 | 0.84 | 0.75 | 0.76 | 0.95 | 0.75 | 0.68 | 0.81 | 0.66 | 0.79 |
| Dy | 5.74 | 4.90 | 4.23 | 4.34 | 5.58 | 4.28 | 3.80 | 4.62 | 3.66 | 4.57 |
| Ho | 1.29 | 1.01 | 0.89 | 0.90 | 1.15 | 0.90 | 0.76 | 0.94 | 0.74 | 0.95 |
| Er | 3.77 | 2.80 | 2.46 | 2.46 | 3.18 | 2.49 | 2.06 | 2.61 | 2.00 | 2.65 |
| Tm | 0.56 | 0.42 | 0.38 | 0.37 | 0.48 | 0.39 | 0.32 | 0.39 | 0.30 | 0.40 |
| Yb | 3.85 | 2.56 | 2.52 | 2.38 | 3.05 | 2.50 | 2.08 | 2.53 | 1.93 | 2.60 |
| Lu | 0.60 | 0.39 | 0.39 | 0.35 | 0.47 | 0.38 | 0.32 | 0.38 | 0.29 | 0.40 |
| REE | 298.70 | 195.22 | 208.09 | 193.52 | 192.26 | 155.87 | 163.77 | 171.54 | 139.46 | 169.18 |

**Appendix 6** Key element ratios of muddy siltstones from the North Qilian belt AC

| Sample | DGK5 | DGK6 | DGK7 | DGK8 | DGK13 | DGK14 | DGK15 | DGK16 | DGK17 | DGK18 |
| --- | --- | --- | --- | --- | --- | --- | --- | --- | --- | --- |
| Key major element ratios | | | | | | | | | | |
| MnO/TiO2 | 0.03 | 0.21 | 0.10 | 0.31 | 0.07 | 0.14 | 0.12 | 0.13 | 0.44 | 0.52 |
| Al2O3/TiO2 | 21.56 | 19.77 | 23.44 | 24.69 | 22.82 | 24.07 | 25.14 | 20.62 | 17.07 | 17.30 |
| Fe2O3/TiO2 | 1.11 | 4.07 | 4.15 | 8.82 | 7.26 | 8.86 | 6.25 | 8.21 | 6.76 | 7.08 |
| Al2O3/(Fe2O3+Al2O3) | 0.95 | 0.83 | 0.85 | 0.74 | 0.76 | 0.73 | 0.80 | 0.72 | 0.72 | 0.71 |
| Key trace element ratios | | | | | | | | | | |
| Th/U | 8.23 | 7.32 | 7.87 | 10.60 | 5.15 | 5.05 | 4.09 | 5.13 | 2.90 | 4.42 |
| Th/Sc | 3.21 | 0.90 | 1.08 | 1.28 | 0.81 | 0.92 | 1.25 | 1.15 | 0.82 | 1.01 |
| Chondrite normalized | | | | | | | | | | |
| Ce* | 18.13 | 14.28 | 15.13 | 14.35 | 14.46 | 13.07 | 13.25 | 13.76 | 12.31 | 13.65 |
| Ce/Ce* | 9.43 | 7.53 | 7.53 | 7.31 | 6.68 | 6.08 | 6.74 | 6.39 | 5.85 | 6.39 |
| Eu* | 8.21 | 7.10 | 7.14 | 7.31 | 7.46 | 6.62 | 6.69 | 7.12 | 6.33 | 6.84 |
| Eu/Eu* | 2.47 | 2.40 | 2.33 | 2.36 | 2.43 | 2.05 | 1.76 | 2.15 | 2.15 | 2.16 |
| La/Yb | 11.45 | 10.14 | 12.17 | 11.43 | 9.03 | 8.99 | 10.96 | 9.81 | 10.12 | 9.28 |
| Lan/Cen | 1.23 | 1.15 | 1.28 | 1.23 | 1.36 | 1.35 | 1.22 | 1.34 | 1.29 | 1.32 |
| Shale normalized | | | | | | | | | | |
| Ce* | 1.73 | 1.37 | 1.45 | 1.37 | 1.38 | 1.25 | 1.27 | 1.32 | 1.18 | 1.31 |
| Ce/Ce* | 0.96 | 0.76 | 0.77 | 0.74 | 0.68 | 0.62 | 0.68 | 0.65 | 0.59 | 0.65 |
| Eu* | 1.46 | 1.27 | 1.27 | 1.30 | 1.34 | 1.19 | 1.19 | 1.27 | 1.14 | 1.23 |
| Eu/Eu* | 0.60 | 0.58 | 0.57 | 0.58 | 0.59 | 0.50 | 0.43 | 0.52 | 0.52 | 0.52 |
| La/Yb | 1.46 | 1.29 | 1.55 | 1.45 | 1.15 | 1.14 | 1.39 | 1.25 | 1.29 | 1.18 |
| Las/Ces | 0.95 | 0.89 | 1.00 | 0.96 | 1.05 | 1.04 | 0.94 | 1.04 | 1.00 | 1.02 |
